# Supplementary material for: YdfD, a Lysis Protein of the Qin Prophage, Is a Specific Inhibitor of the IspG-Catalyzed Step in the MEP Pathway of Escherichia coli
Source: MDPI journal article supplement (doi:10.3390/ijms23031560), 2022-01-29
Supplement: s1 [file s1]

## Supplementary Materials

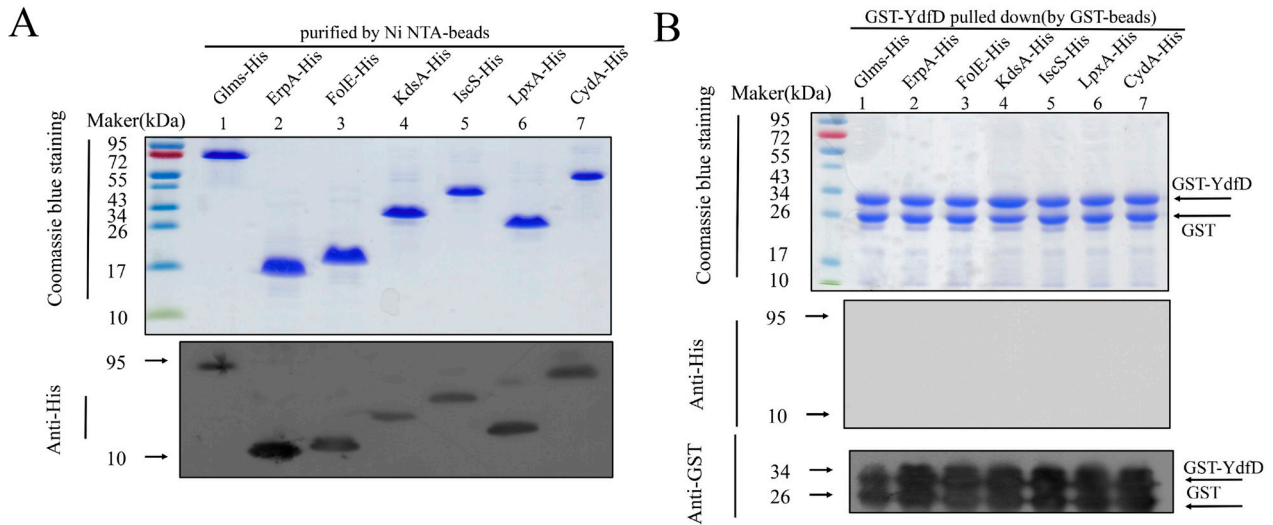

**Figure S1. Pull-down assays between YdfD and potential target proteins.** (A), lane 1: GlmS-His; lane 2: ErpA-His; lane 3: FolE-His; lane 4: KdsA-His; lane 5: IscS-His; lane 6: LpxA-His; lane 7: CydA-His, all the seven proteins were purified by Ni beads; (B), lane 1: GlmS-His; lane 2: ErpA-His; lane 3: FolE-His; lane 4: KdsA-His; lane 5: IscS-His; lane 6: LpxA-His; lane 7: CydA-His, all the seven proteins were pulled down by GST-YdfD. The results showed that GST-YdfD did not interact with above-mentioned proteins.

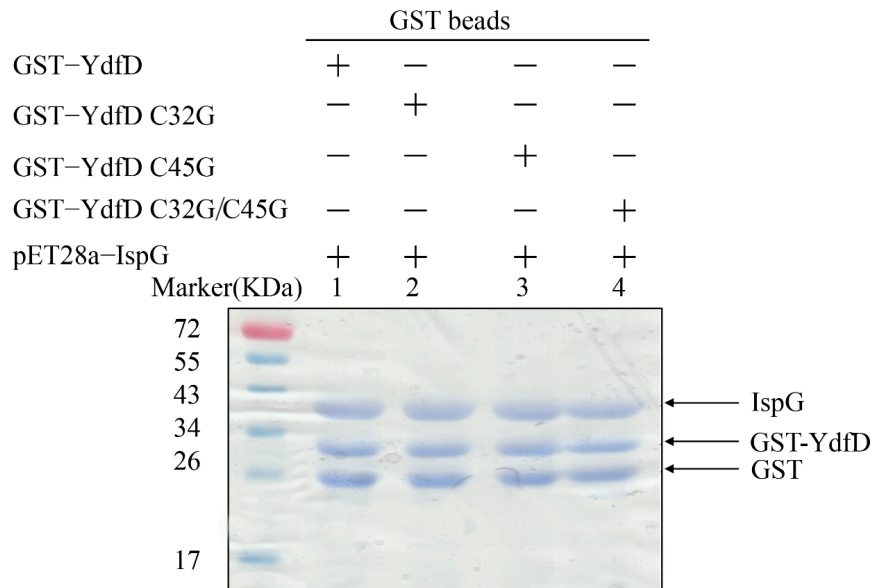

**Figure S2. Pull-down assays between YdfD or its derivatives with IspG.** Lane1: Wild type YdfD pulled down IspG, lan 2: YdfD C32G pulled down IspG, lane 3: YdfD C45G pulled down IspG, lane 4: YdfD C32G/C45G pulled down IspG. The results showed that a disulfide bond did not form between the YdfD and IspG.

Table S2. Plasmids used in this study.

| Plasmid                                  | Genotype                                                           | Restriction site |
|------------------------------------------|--------------------------------------------------------------------|------------------|
| pET22b                                   | P <sub>T7</sub> , Amp <sup>r</sup> , ori <sub>pBR322</sub> , lacI  |                  |
| pET22b- <i>ydfD</i>                      | <i>ydfD</i> cloned on pET22b                                       | Nde I /Xho I     |
| pET22b- <i>ydfD</i> -HA                  | <i>ydfD</i> cloned on pET22b with HA tag                           | Nde I /Xho I     |
| pET22b- <i>his</i> - <i>ydfD</i>         | <i>ydfD</i> cloned on pET22b with His tag                          | Nde I /Xho I     |
| pET22b- <i>ydfD</i> C1                   | <i>ydfD</i> C1 cloned on pET22b                                    | Nde I /Xho I     |
| pET22b- <i>ydfD</i> C2                   | <i>ydfD</i> C2 cloned on pET22b                                    | Nde I /Xho I     |
| pET22b- <i>ydfD</i> C5                   | <i>ydfD</i> C5 cloned on pET22b                                    | Nde I /Xho I     |
| pET22b- <i>ydfD</i> N1                   | <i>ydfD</i> N1 cloned on pET22b                                    | Nde I /Xho I     |
| pET22b- <i>ydfD</i> N2                   | <i>ydfD</i> N2 cloned on pET22b                                    | Nde I /Xho I     |
| pET22b- <i>ydfD</i> N5                   | <i>ydfD</i> N5 cloned on pET22b                                    | Nde I /Xho I     |
| pGEX-6P-1                                | P <sub>tac</sub> , Amp <sup>r</sup> , ori <sub>pBR322</sub> , lacI |                  |
| pGEX-6P-1- <i>ydfD</i>                   | <i>ydfD</i> cloned on pGEX-6p-1                                    | BamH I /Xho I    |
| pGEX-6P-1- <i>ydfD</i> N28               | <i>ydfD</i> N28 cloned on pGEX-6p-1                                | BamH I /Xho I    |
| pGEX-6P-1- <i>ydfD</i> C35               | <i>ydfD</i> C35 cloned on pGEX-6p-1                                | BamH I /Xho I    |
| pGEX-6P-1- <i>ydfD</i> C32G              | <i>YdfD</i> C32G cloned on pGEX-6p-1                               | BamH I /Xho I    |
| pGEX-6P-1- <i>ydfD</i> C45G              | <i>YdfD</i> C45G cloned on pGEX-6p-1                               | BamH I /Xho I    |
| pGEX-6P-1- <i>ydfD</i> C32G/C45G         | <i>YdfD</i> C32G/C45g cloned on pGEX-6p-1                          | BamH I /Xho I    |
| pET22b- <i>mbp</i> - <i>ydfD</i>         | <i>mbp</i> - <i>YdfD</i> cloned on pET22b                          | Nde I /Xho I     |
| pET28a                                   | P <sub>T7</sub> , Kan <sup>r</sup> , ori <sub>pBR322</sub> , lacI  |                  |
| pET28a- <i>ispG</i> - <i>his</i>         | <i>ispG</i> cloned on pET28a with His tag                          | Nco I /Xho I     |
| pET28a- <i>ispG</i> - <i>his</i> 1-279   | <i>ispG</i> 1-279 cloned on pET28a with His tag                    | Nco I /Xho I     |
| pET28a- <i>ispG</i> - <i>his</i> 280-372 | <i>ispG</i> 280-372 cloned on pET28a with His tag                  | Nco I /Xho I     |
| pET22b- <i>ydfD</i> - <i>cfp</i>         | <i>ydfD</i> - <i>cfp</i> cloned on pET22b                          | Nde I /Xho I     |
| pET28a- <i>ispG</i> - <i>yfp</i>         | <i>ispG</i> - <i>yfp</i> cloned on pET28a                          | Nco I /Xho I     |

Table S3. Primer and gene sequence

| Primer and gene sequence                    | Sequence (5'-3')                                  |
|---------------------------------------------|---------------------------------------------------|
| pET22b- <i>ydfD</i> 5F                      | CATATGAATTCAGCATTTGTGCTT                          |
| pET22b- <i>ydfD</i> 3R                      | CTCGAGAAGACCTGCCGGGATT                            |
| pET22b- <i>ydfD</i> HA 3R                   | CTCGAGAGCGTAGTCTGGGACGTCGTATGGGTAAAGACCTGCCGGGATT |
| pET22b- <i>ydfD</i> C13R                    | CTCGAGACCTGCCGGGATTTCGA                           |
| pET22b- <i>ydfD</i> C2 3R                   | CTCGAGTGCCGGGATTTCGATATT                          |
| pET22b- <i>ydfD</i> C5 3R                   | CTCGAGTTCGATATTATCCTGGTG                          |
| pET22b- <i>ydfD</i> N1 5F                   | CATATGTCAGCATTTGTGCTT                             |
| pET22b- <i>ydfD</i> N2 5F                   | CATATGGCATTGTGCTTGT                               |
| pET22b- <i>ydfD</i> N5 5F                   | CATATGCTTGTTCTGACAGTT                             |
| pGEX-6P-1- <i>ydfD</i> 5F                   | GGATCCATGAATTCAGCATTTG                            |
| pGEX-6P-1- <i>ydfD</i> 3R                   | CTCGAGTTCGATATTATCCTGGT                           |
| pGEX-6P-1- <i>ydfD</i> N28 5F               | CTCGAGACAATGCAGGAGTGTATG                          |
| pGEX-6P-1- <i>ydfD</i> C35 3R               | CTCGAGTCATTACATTGTCCTGTGAACA                      |
| pGEX-6P-1- <i>ydfD</i> C32G 5F              | CAGTGTTACAGGACAATGCAGGAGGGTATGACTGCAGCAA          |
| pGEX-6P-1- <i>ydfD</i> C32G 3R              | TTCTGTTCGGTTGCTGCAGTCATACCCCTCCTGCATTGTCCT        |
| pGEX-6P-1- <i>ydfD</i> C45G 5F              | AACCGAACAGAAAATTCCCGGTAACGGTTACCCGGTTCGATA        |
| pGEX-6P-1- <i>ydfD</i> C45G 3R              | GGTGAATAACTTTATCGACCGGGTAACCGTTACCGGGAATTT        |
| pET28a- <i>ispG</i> -5F                     | CCATGGCGATGCATAACCAGGCTCCA                        |
| pET28a- <i>ispG</i> -3R                     | CTCGAGTTTTTCAACCTGCTGAAC                          |
| pET28a- <i>ispG</i> - <i>his</i> 1-279 3R   | CTCGAGATCAAATTCCTGACGCGAA                         |
| pET28a- <i>ispG</i> - <i>his</i> 280-372 5F | CCATGGCGATGGTTATCGGTACGG                          |
| pET22b- <i>ydfD</i> - <i>cfp</i> 3R         | CTCGAGCTTGTTACAGCTCGTCCAT                         |
| RTPCR- <i>ydfD</i> -F                       | AGCATTGTGCTTGTCT                                  |

RTPCR-*ydfD*-R  
RTPCR-16S-F  
RTPCR-16S-R

TGCTGCAGTCATACACTC  
TGCTGCAGTCATACACTC  
GGCAGTTTCCCAGACATTAC

---

*ydfD*

ATGAATTCAGCATTTGTGCTTGTTCTGACAGTTTTCTTGTTTCCGGA-  
GAGCCAGTTGATATTGCAGACAGTGTTTACAGGACAATGCAGGAGTG-  
TATGACTGCAGCAACCGAACAGAAAAATCCCGGTAAGTGTACCCGGTCTGA-  
TAAAGTTATTACCAGGATAATATCGAAATCCCGGCAGGTCTT

*ispG*

ATGCATAACCAGGCTCCAATTCAACGTAGAAAATCAACACGTATTTACGTT-  
GGGAATGTGCCGATTGGCGATGGTGCTCCCATCGCCGTACAGTCCATGAC-  
CAATACGCGTACGACAGACGTCTGAAGCAAC-  
GGTCAATCAAATCAAGGCGCTGGAACGCGTTGGCGCTGATATCGTCCGTG-  
TATCCGTACCGACGATGGACGCGGCAGAAGCGTTCAAATCATCAAACAG-  
CAGGTTAACGTGCCGCTGGTGGCTGACATCCACTTCGACTATCGCATT-  
GCGCTGAAAGTAGCGGAATACGGCGTCGATTGTCTGCGTATTAACCCTGG-  
CAATATCGGTAATGAAGAGCGTATTCGCATGGTGGTTGACTGTGCGCGCGA-  
TAAAAACATTCCGATCCGTATTGGCGTTAACGCCGGATCGCTGGAAAAA-  
GATCTGCAAGAAAAGTATGGCGAACCGACGCCGCAGGCGTTGCTG-  
GAATCTGCCATGCGTCATGTTGATCATCTCGATCGCCTGAACCTTCGATCAG-  
TTCAAAGTCAGCGTGAAAGCGTCTGACGTCTTCCTCGCTGTTGAG-  
TCTTATCGTTTGCTGGCAAAACAGATCGATCAGCCGTTGCATCTGGGGATCAC-  
CGAAGCCGGTGGTGCGCGCAGCGGGGCAGTAAAATCCGCCATT-  
GGTTTAGGTCTGCTGCTGTCTGAAGGCATCGGCGACACGCTGCGCG-  
TATCGCTGGCGGCCGATCCGGTCTGAAGAGATCAAAGTCGGTTTCGATATTTT-  
GAAATCGCTGCGTATCCGTTGCGGAGGGATCAACTTCATCGCCTGCCCCGAC-  
CTGTTGCGGTCAGGAATTTGATGTTATCGGTACGGTTAACGCGCTGGAGCAAC-  
GCCTGGAAGATATCATCACTCCGATGGACGTTTCGAT-  
TATCGGCTGCGTGGTGAATGGCCCAGGTGAGGCGCTGGTTTCTACAC-  
TCGGCGTCACCGGCGGCAACAAGAAAAGCGGCCTCTATGAA-  
GATGGCGTGCGCAAAGACCGTCTGGACAACAACGATATGATCGACCAGCTG-  
GAAGCACGCATTTCGTGCGAAAGCCAGTCAGCTGGACGAAGCGCGTCTGAATT-  
GACGTTTACGAGGTTGAAAAA

---
